# Supplementary material for: Searching for double σ- and π-aromaticity in borazine derivatives
Source: Royal Society of Chemistry journal article supplement (doi:10.1039/d0ra05939k), 2020-01-01
Supplement: d0ra05939k2.pdf [file d0ra05939k2.pdf]

# Searching for doubly $\sigma$ - and $\pi$ -aromaticity in borazine derivatives

*Ricardo Pino-Rios<sup>\*a</sup>, Alejandro Vásquez-Espinal<sup>b</sup>, Osvaldo Yañez<sup>b,c</sup> and William Tiznado<sup>\*b</sup>*

<sup>a</sup>Laboratorio de Química Teórica, Facultad de Química y Biología, Universidad de Santiago de Chile (USACH), Av. Libertador Bernardo O'Higgins 3363, Santiago, Estación Central, Región Metropolitana, Chile

<sup>b</sup>Computational and Theoretical Chemistry Group, Departamento de Ciencias Químicas, Facultad de Ciencias Exactas, Universidad Andres Bello, República 498, Santiago, Chile.

<sup>c</sup>Center for Bioinformatics and Integrative Biology (CBIB), Facultad de Ciencias de la Vida, Universidad Andres Bello, Av. Republica 330, Santiago 8370146, Chile

**Figure S1.-** Structures, symmetry point group and relative energy of the 23 lowest energy singlet state structures (within the range of 0-135 kcal·mol<sup>-1</sup> with respect to the putative global minimum structure) of the B<sub>3</sub>N<sub>3</sub>H<sub>3</sub><sup>+</sup> system at the PBE0-D3/def2-TZVP level. Relative energies are listed in kcal·mol<sup>-1</sup>, with zero-point energy (ZPE) corrections. \*AUTOMATON did not identify the structure.

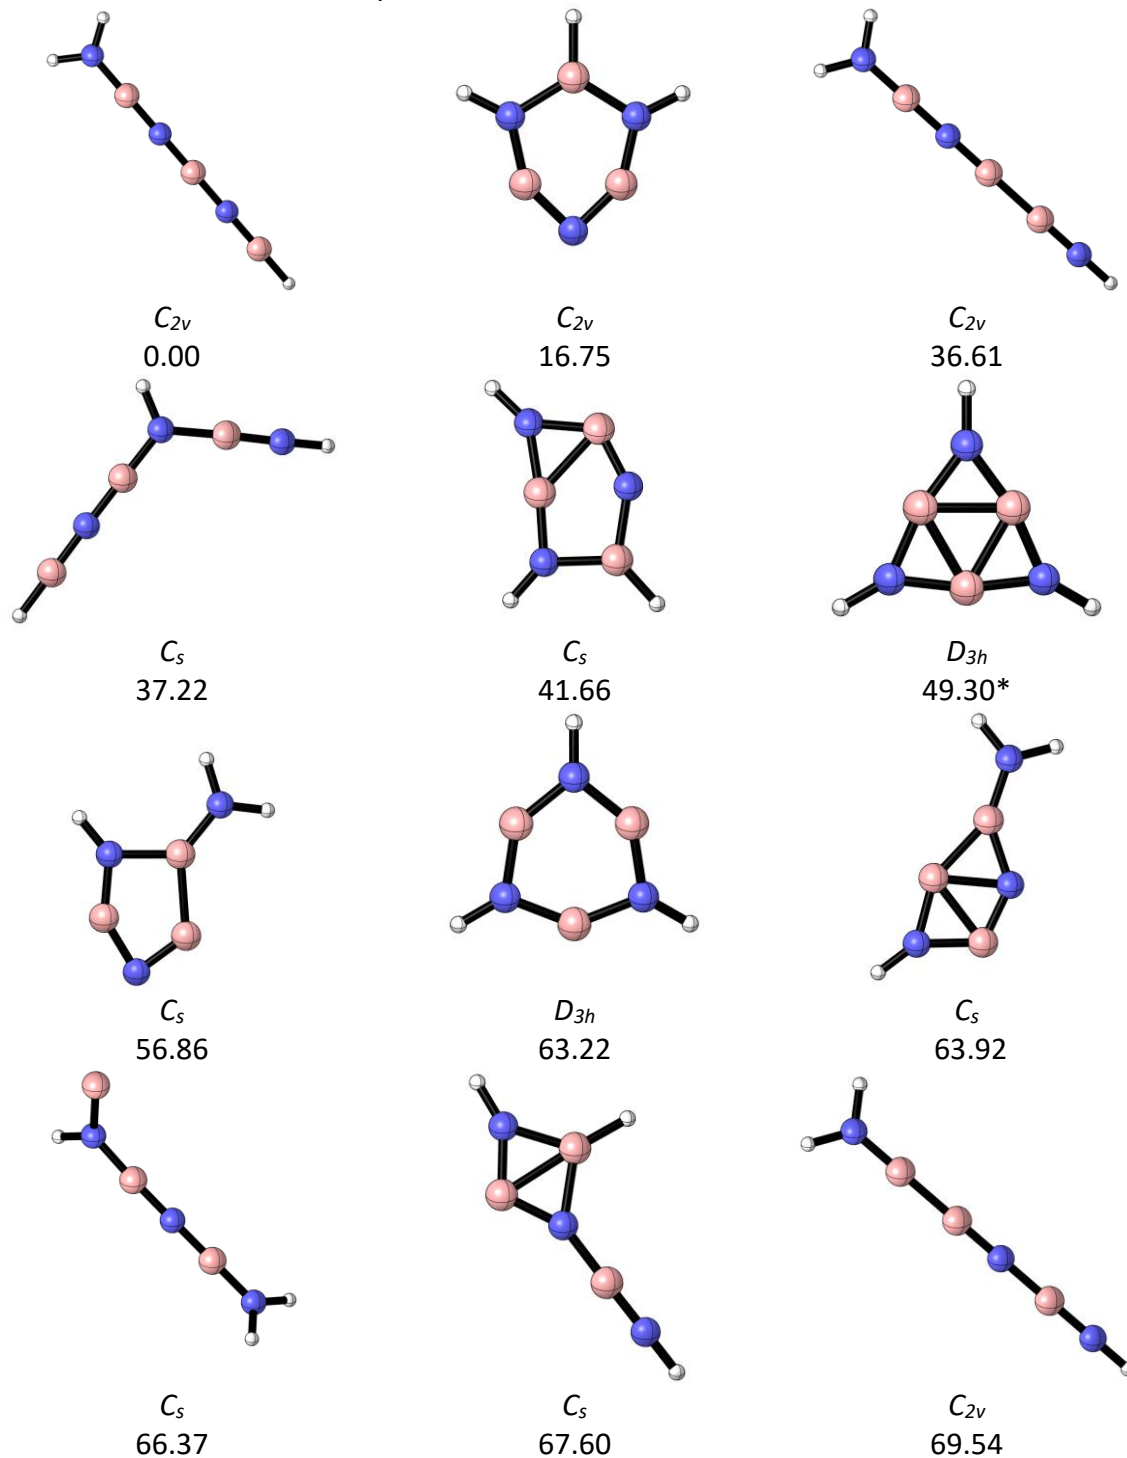

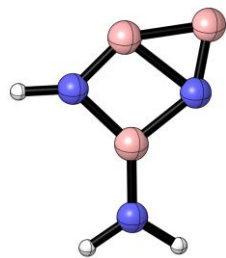

$C_s$   
71.27

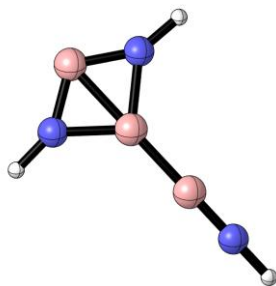

$C_{2v}$   
74.08

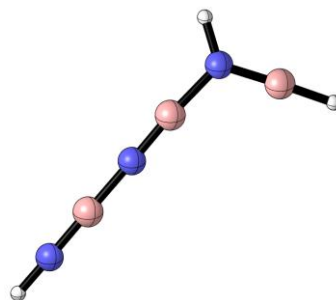

$C_s$   
74.60

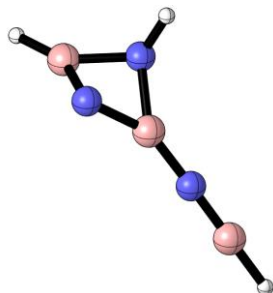

$C_1$   
75.69

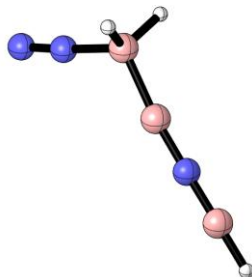

$C_s$   
77.74

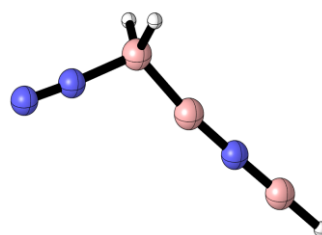

$C_s$   
77.74

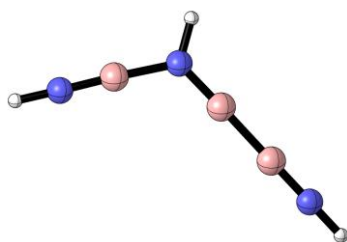

$C_s$   
81.73

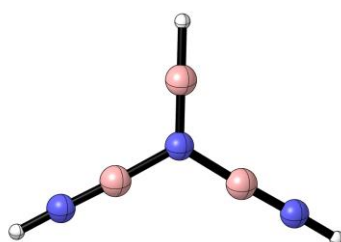

$C_{2v}$   
85.83

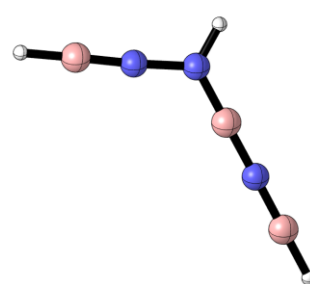

$C_s$   
86.64

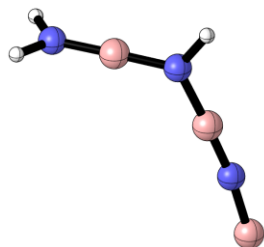

$C_s$   
90.64

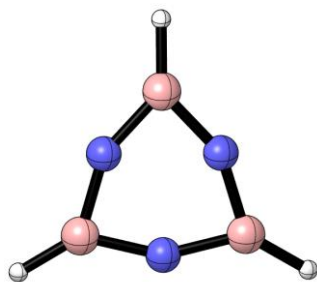

$D_{3h}$   
134.35

**Figure S2.** Structures, symmetry point group and relative energy of the 19 lowest energy singlet state structures within the range of 0-69 kcal·mol<sup>-1</sup> with respect to the putative global minimum structure of the B<sub>3</sub>N<sub>3</sub>(TeH)<sub>6</sub><sup>2+</sup> system at the PBE0-D3/def2-TZVP level. Relative energies are listed in kcal·mol<sup>-1</sup>, with zero-point energy (ZPE) corrections.

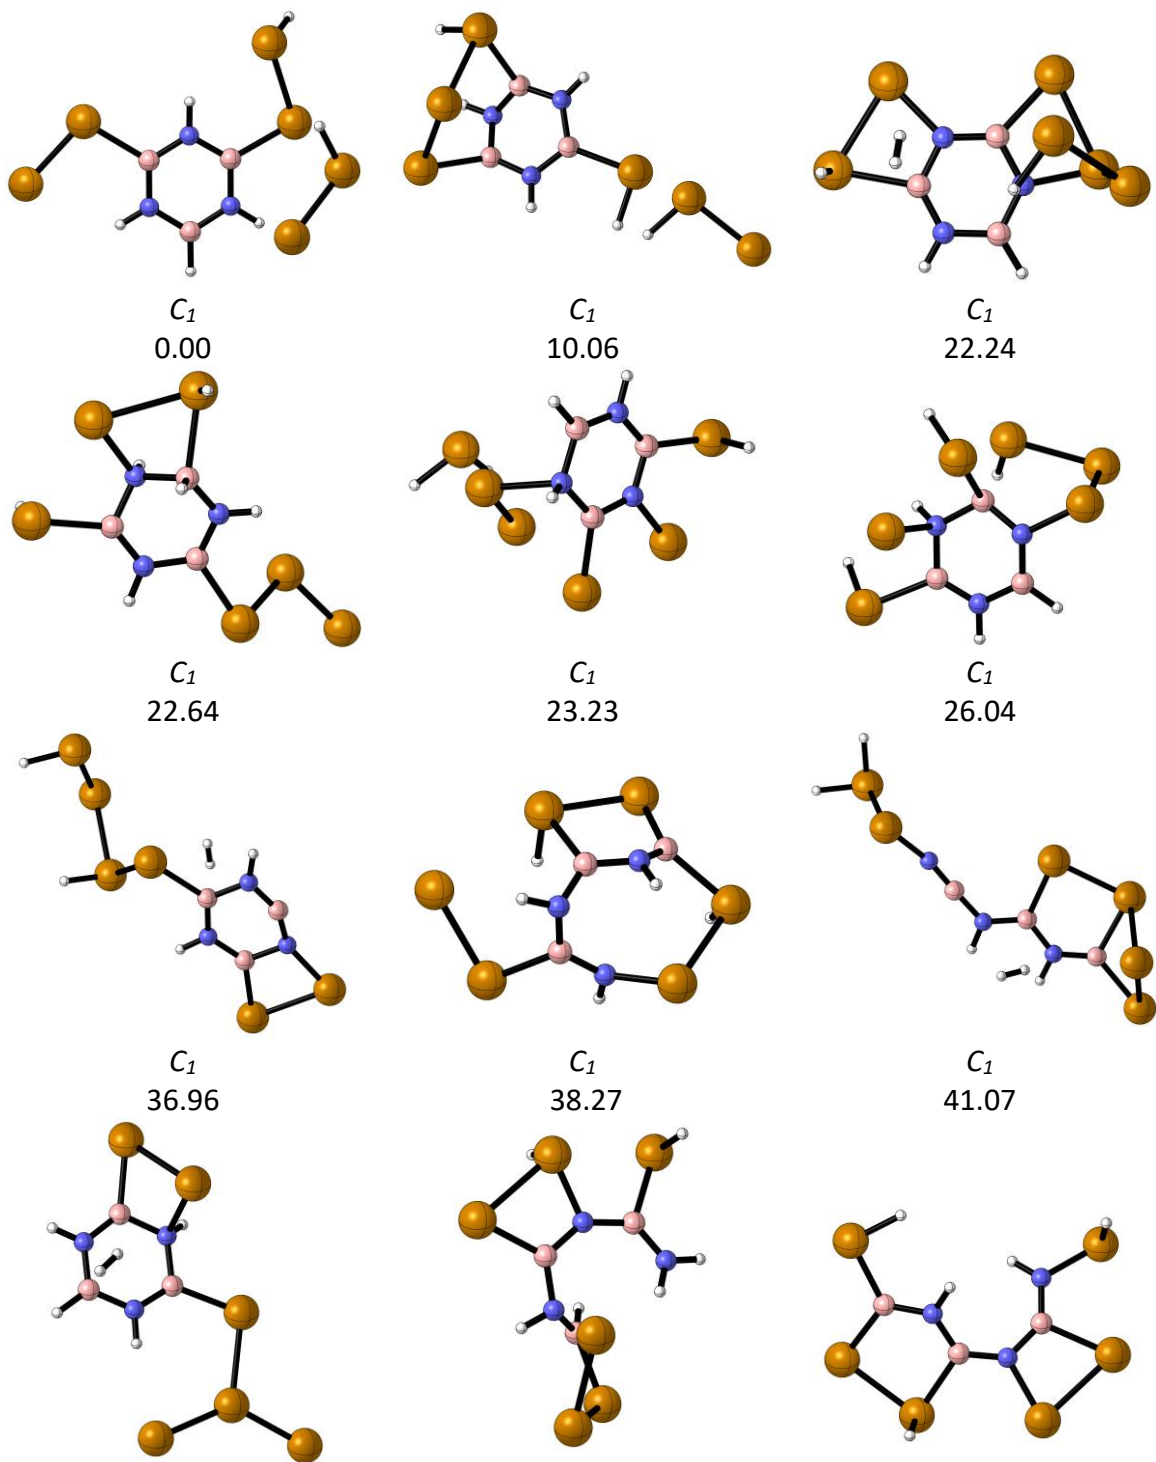

$C_1$   
44.83

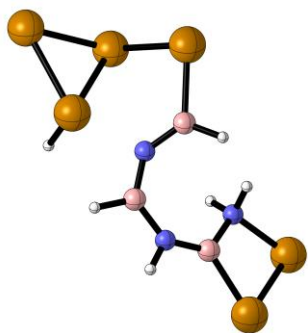

$C_1$   
45.43

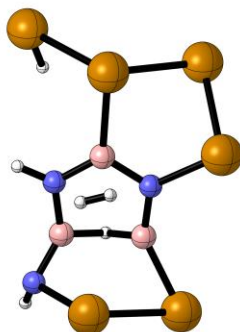

$C_1$   
49.99

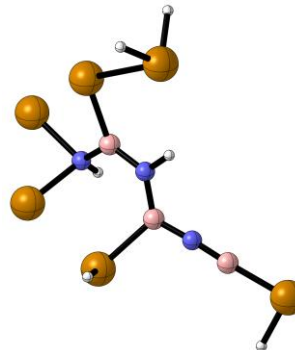

$C_1$   
50.83

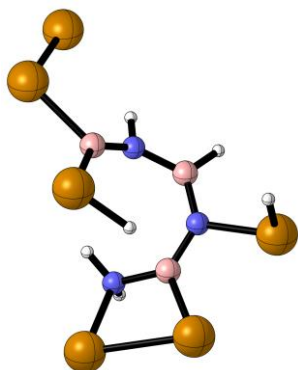

$C_1$   
56.53

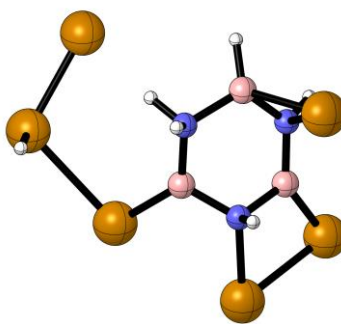

$C_1$   
63.33

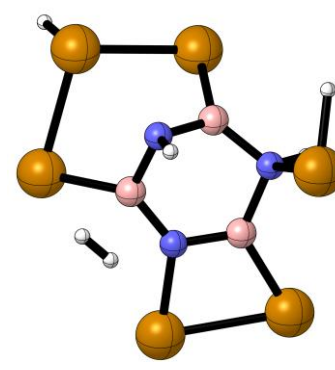

$C_1$   
63.87

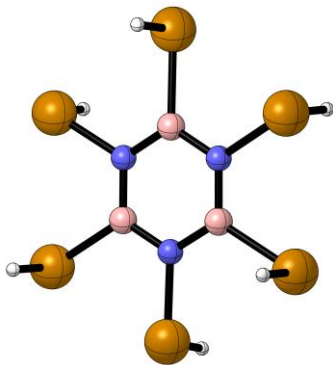

$C_1$   
65.84

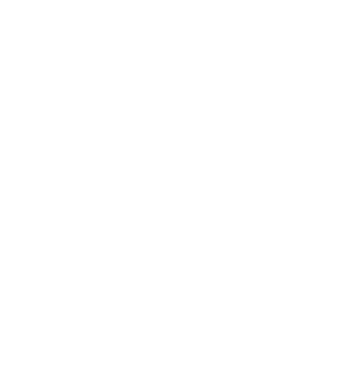

$C_1$   
68.14

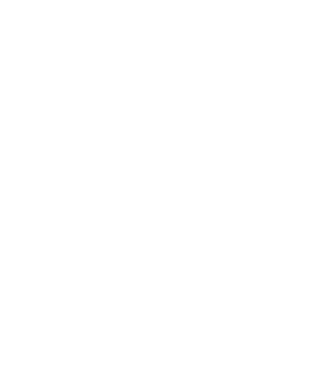

$C_{3v}$   
68.69

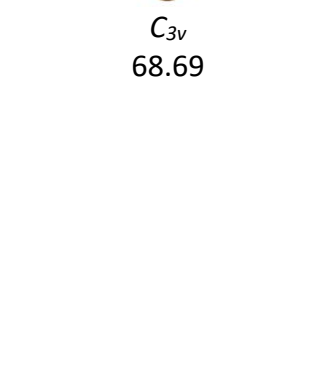

**Figure S3.** Structures, symmetry point group and relative energy of the 10 lowest energy singlet state structures (within the range of 0-30 kcal·mol<sup>-1</sup> with respect to the putative global minimum structure) of the B<sub>3</sub>N<sub>3</sub>I<sub>6</sub><sup>2+</sup> system at the PBE0-D3/def2-TZVP level. Relative energies are listed in kcal·mol<sup>-1</sup>, with zero-point energy (ZPE) corrections.

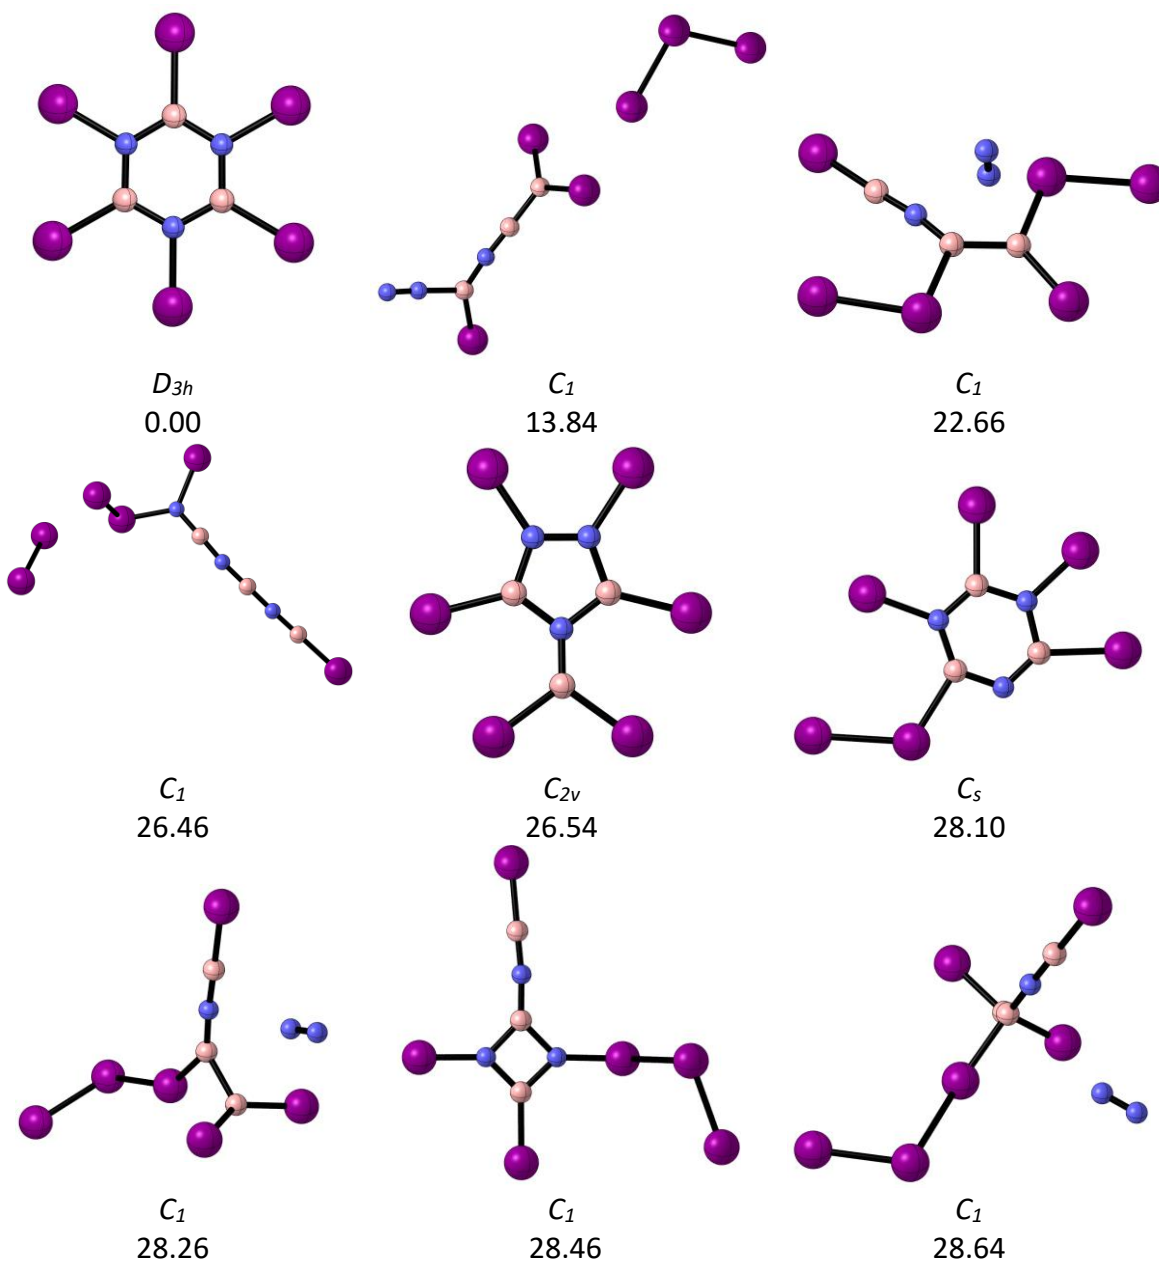

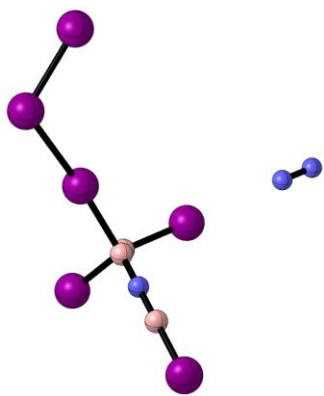

C<sub>1</sub>  
28.72

**Figure S4.** Structures, symmetry point group and relative energy of the 4 lowest energy triplet state structures within the range of 0-30 kcal·mol<sup>-1</sup> with respect to the putative global minimum structure of the B<sub>3</sub>N<sub>3</sub>I<sub>6</sub><sup>2+</sup> system at the PBE0-D3/def2-TZVP level. Relative energies are listed in kcal·mol<sup>-1</sup>, with zero-point energy (ZPE) corrections.

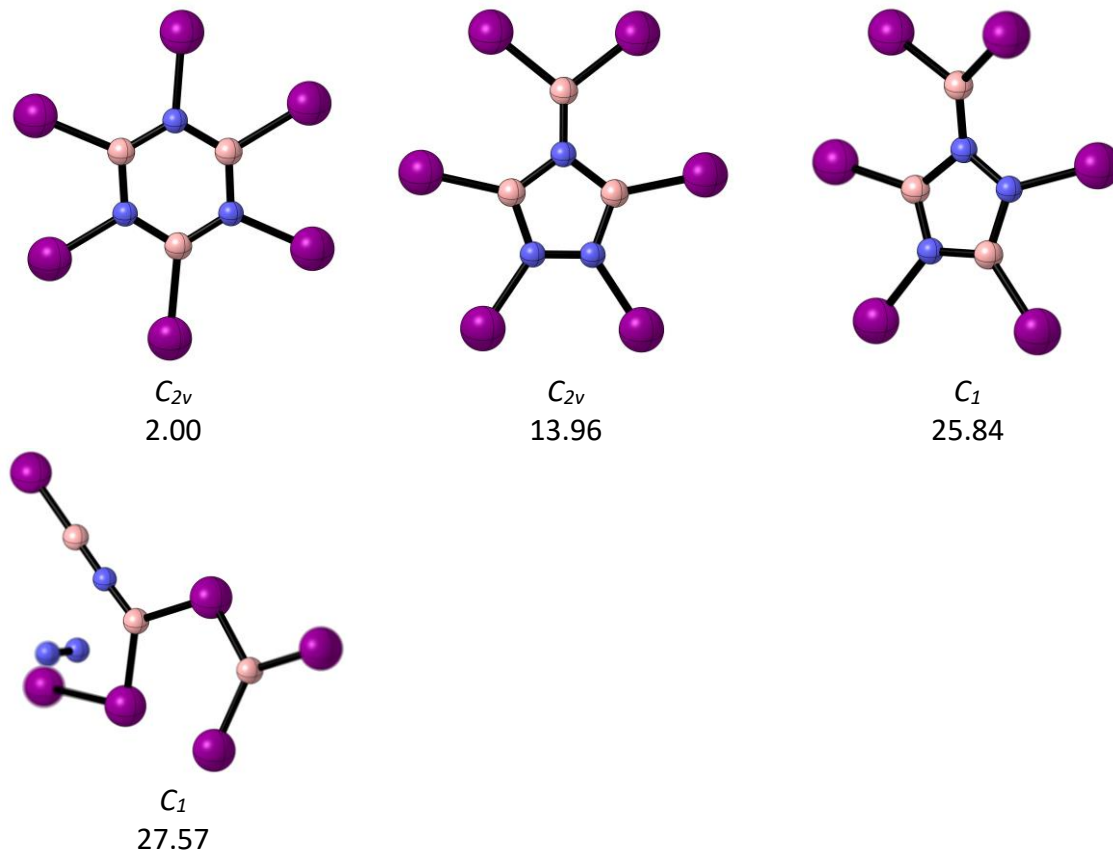



**Figure S5.** AdNDP bonding pattern of  $B_3N_3(TeH)_6^{2+}$

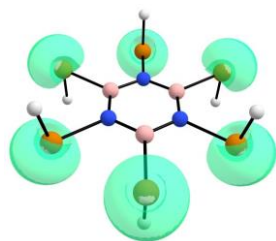

6 x 1c-2e Te-LPs  
ON = 1.98 – 1.99 |e|

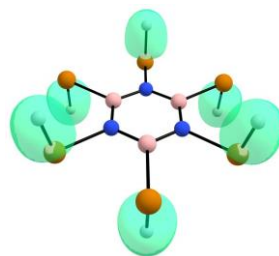

6 x 2c-2e Te-H  $\sigma$ -bonds  
ON = 1.97 – 2.00 |e|

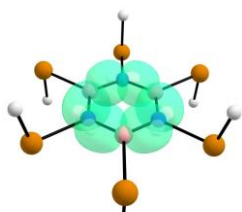

6 x 2c-2e B-N  $\sigma$ -bonds  
ON = 1.98 |e|

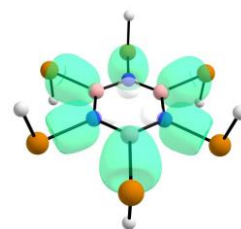

6 x 2c-2e B(N)-Te  $\sigma$ -bonds  
ON = 1.97 – 1.98 |e|

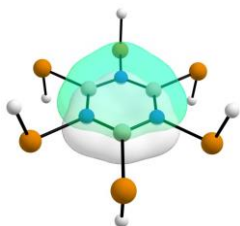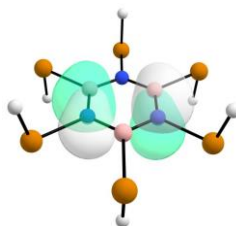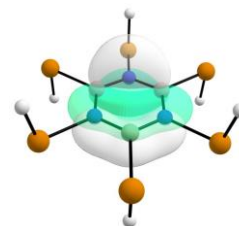

3 x 6c-2e  $\pi$ -bonds  
ON = 1.98 – 1.99 |e|

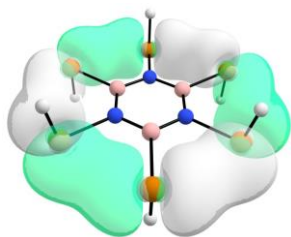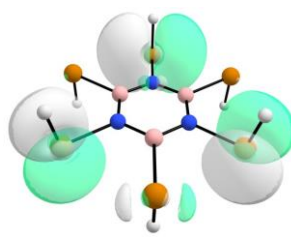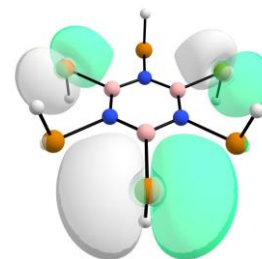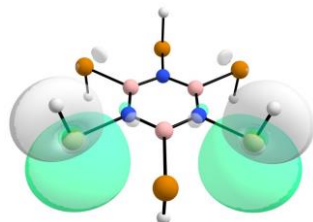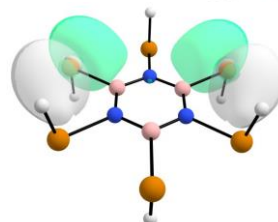

5 x 6c-2e  $\sigma$ -bonds  
ON = 1.92 – 1.97 |e|

**Figure S6.** Vector maps of dissected Magnetically induced current density (MICD) at  $1 a_0$  above the molecular plane of  $B_3N_3(TeH)_6^{2+}$

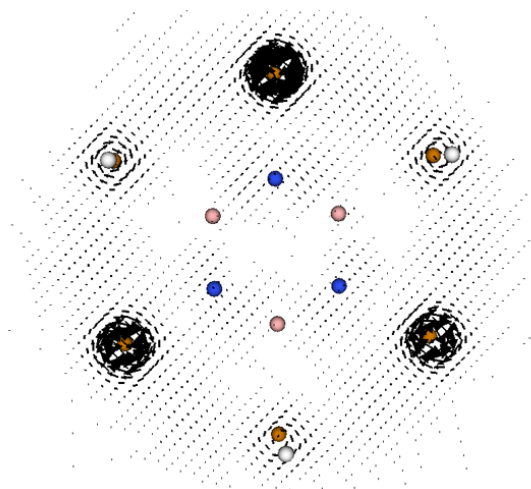

8.5 nA.T<sup>-1</sup>  
(a)  $B_3N_3(TeH)_6^{2+}$  *outer- $\sigma$*  current density map

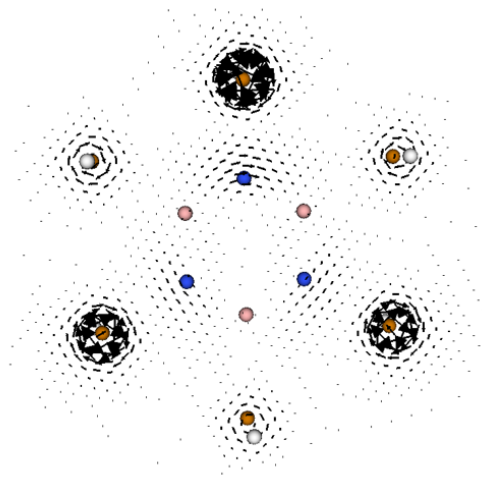

3.6 nA.T<sup>-1</sup>  
(b)  $B_3N_3(TeH)_6^{2+}$  *inner- $\pi$*  current density map

**Table S1.** Extra cyclic resonance energies (kcal/mol) and RCSs values (nA/T) of five member rings  $C_4XH_4$ .

| Compound | ECRE  | RCS (X1-C2) | RCS (C3-C4) |
|----------|-------|-------------|-------------|
| AlH      | -3.5  | -3.0        | -2.8        |
| CH-      | 19.1  | 13.1        | 13.1        |
| CH2      | 3.4   | 5.6         | 5.7         |
| NH       | 17.9  | 11.6        | 12.0        |
| O        | 12.8  | 10.2        | 10.5        |
| PH       | 17.9  | 12.5        | 12.8        |
| S        | 12.7  | 11.9        | 12.1        |
| SiH+     | -15.5 | -10.4       | -10.1       |
| SiH-     | 17.2  | 12.5        | 12.4        |
| SiH2     | -0.8  | 1.7         | 1.8         |

**Scheme S1.** Resonance energy definitions of five membered rings and their acyclic counterparts according to ref. 60.

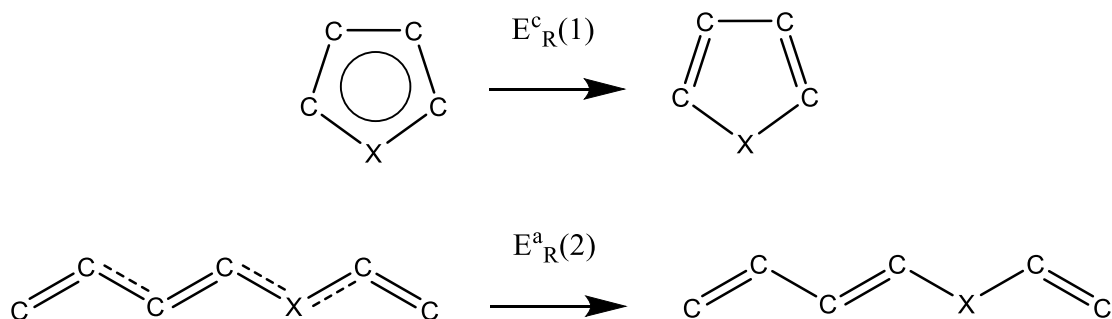

**Table S2.-** Cartesian coordinates at the PBE0/def2-TZVP level of the global minimum of  $B_3N_3H_3^+$ ,  $B_3N_3(TeH)_6^{2+}$  and  $B_3N_3I_6^{2+}$ . Coordinates for the doubly aromatic local minimum ( $B_3N_3H_3^+$ , and  $B_3N_3(TeH)_6^{2+}$ ) and lowest triplet of  $B_3N_3I_6^{2+}$  are also included. Relative energies are listed in kcal·mol<sup>-1</sup>

|                                                             |              |              |                                                              |    |              |              |              |
|-------------------------------------------------------------|--------------|--------------|--------------------------------------------------------------|----|--------------|--------------|--------------|
| <b><math>B_3N_3H_3^+</math> (0.00) singlet state</b>        |              |              | <b><math>B_3N_3H_3^+</math> (49.30) singlet state</b>        |    |              |              |              |
| H                                                           | 4.595360000  | -0.000687000 | -0.000422000                                                 | B  | -0.962163000 | 0.000000000  | 0.000000000  |
| H                                                           | -3.647992000 | -0.849414000 | 0.000226000                                                  | B  | 0.481083000  | 0.833258000  | 0.000000000  |
| B                                                           | 3.424898000  | -0.000474000 | -0.000187000                                                 | B  | 0.481083000  | -0.833258000 | 0.000000000  |
| H                                                           | -3.648940000 | 0.847917000  | 0.000221000                                                  | N  | 1.609467000  | 0.000000000  | 0.000000000  |
| N                                                           | 2.158522000  | -0.000007000 | 0.000600000                                                  | N  | -0.804731000 | -1.393839000 | 0.000000000  |
| N                                                           | -3.100004000 | -0.000443000 | 0.000154000                                                  | N  | -0.804731000 | 1.393839000  | 0.000000000  |
| B                                                           | 0.835464000  | 0.000471000  | -0.000077000                                                 | H  | 2.620718000  | 0.000000000  | 0.000000000  |
| B                                                           | -1.755249000 | 0.000371000  | -0.000151000                                                 | H  | -1.310358000 | -2.269606000 | 0.000000000  |
| N                                                           | -0.461945000 | 0.000498000  | -0.000461000                                                 | H  | -1.310358000 | 2.269606000  | 0.000000000  |
| <b><math>B_3N_3I_6^{2+}</math> (0.00) singlet state</b>     |              |              | <b><math>B_3N_3I_6^{2+}</math> (2.00) triplet state</b>      |    |              |              |              |
| B                                                           | 0.000000000  | 1.240158000  | -0.715878000                                                 | B  | -1.268786000 | -0.713673000 | 0.000000000  |
| N                                                           | 0.000000000  | 0.000000000  | -1.410032000                                                 | N  | -1.245264000 | 0.715413000  | 0.000000000  |
| N                                                           | 0.000000000  | 1.221216000  | 0.705216000                                                  | N  | 0.000000000  | -1.375691000 | 0.000000000  |
| I                                                           | 0.000000000  | 0.000000000  | -3.428257000                                                 | I  | -2.903897000 | 1.897765000  | 0.000000000  |
| I                                                           | 0.000000000  | 2.969327000  | 1.713977000                                                  | I  | -0.000390000 | -3.400331000 | 0.000000000  |
| B                                                           | 0.000000000  | -1.240158000 | -0.715878000                                                 | B  | 0.000471000  | 1.398886000  | 0.000000000  |
| B                                                           | 0.000000000  | 0.000000000  | 1.432255000                                                  | B  | 1.269102000  | -0.714011000 | 0.000000000  |
| I                                                           | 0.000000000  | -3.076241000 | -1.776100000                                                 | I  | -0.000411000 | 3.555701000  | 0.000000000  |
| I                                                           | 0.000000000  | 0.000000000  | 3.552405000                                                  | I  | 2.990960000  | -1.977917000 | 0.000000000  |
| N                                                           | 0.000000000  | -1.221216000 | 0.705216000                                                  | N  | 1.245814000  | 0.715071000  | 0.000000000  |
| I                                                           | 0.000000000  | -2.969327000 | 1.713977000                                                  | I  | 2.904743000  | 1.897326000  | 0.000000000  |
| I                                                           | 0.000000000  | 3.076241000  | -1.776100000                                                 | I  | -2.991152000 | -1.977064000 | 0.000000000  |
| <b><math>B_3N_3(TeH)_6^{2+}</math> (0.00) singlet state</b> |              |              | <b><math>B_3N_3(TeH)_6^{2+}</math> (68.69) singlet state</b> |    |              |              |              |
| Te                                                          | -2.154013000 | 1.321219000  | 1.246680000                                                  | Te | -3.312911000 | -1.496944000 | -0.095722000 |
| Te                                                          | -2.524572000 | -2.986723000 | -0.558777000                                                 | Te | 3.154792000  | 1.425438000  | 0.099906000  |
| B                                                           | -0.286182000 | 0.126959000  | 1.081656000                                                  | Te | 2.952827000  | -2.120471000 | -0.095679000 |
| Te                                                          | -3.897534000 | -0.848936000 | -0.295364000                                                 | Te | 0.360141000  | 3.617467000  | -0.095733000 |
| Te                                                          | -1.651750000 | 3.086823000  | -0.751338000                                                 | Te | -0.342824000 | -3.444924000 | 0.099900000  |
| Te                                                          | 5.686961000  | -0.960169000 | -0.017187000                                                 | Te | -2.812002000 | 2.019437000  | 0.099950000  |
| N                                                           | 0.885949000  | 0.665334000  | 0.467056000                                                  | N  | 1.295667000  | 0.585492000  | -0.018992000 |
| Te                                                          | 3.941375000  | 0.841162000  | -0.424837000                                                 | N  | -0.140874000 | -1.414868000 | -0.019125000 |
| N                                                           | -0.247110000 | -1.168439000 | 1.633530000                                                  | N  | -1.154956000 | 0.829386000  | -0.018984000 |
| N                                                           | 2.106253000  | -1.388574000 | 1.021147000                                                  | B  | 1.161433000  | -0.834121000 | -0.019980000 |
| B                                                           | 0.943725000  | -1.974034000 | 1.624313000                                                  | B  | -1.303189000 | -0.588820000 | -0.019966000 |
| B                                                           | 2.076855000  | -0.103129000 | 0.470426000                                                  | B  | 0.141563000  | 1.422947000  | -0.019841000 |
| H                                                           | -1.054949000 | -1.566568000 | 2.088908000                                                  | H  | -3.372772000 | -1.525234000 | 1.563181000  |
| H                                                           | -2.032237000 | 4.348933000  | 0.255220000                                                  | H  | 3.350875000  | 1.513803000  | -1.549135000 |
| H                                                           | 2.959923000  | -1.930518000 | 1.019116000                                                  | H  | 3.006858000  | -2.158593000 | 1.563228000  |
| H                                                           | -3.391510000 | 0.028493000  | -1.632314000                                                 | H  | 0.366477000  | 3.683533000  | 1.563165000  |
| H                                                           | 0.845403000  | 1.601647000  | 0.086149000                                                  | H  | -0.364144000 | -3.659018000 | -1.549125000 |
| H                                                           | 0.961474000  | -3.064786000 | 2.091598000                                                  | H  | -2.986442000 | 2.145211000  | -1.549072000 |
